# Supplementary material for: The disappearing periglacial ecosystem atop Mt. Kilimanjaro supports both cosmopolitan and endemic microbial communities
Source: PubMed Central journal article supplement (PMC6650471; doi:10.1038/s41598-019-46521-0), 2019-07-23
Supplement: 41598_2019_46521_MOESM1_ESM.pdf [file 41598_2019_46521_MOESM1_ESM.pdf]

**The disappearing periglacial ecosystem atop Mt. Kilimanjaro supports both cosmopolitan and endemic microbial communities**

Lara Vimercati<sup>a</sup>,

John L. Darcy<sup>b</sup>,

Steve K. Schmidt<sup>a#</sup> (corresponding author)

#Address correspondence to [steve.schmidt@Colorado.edu](mailto:steve.schmidt@Colorado.edu)

Department of Ecology and Evolutionary Biology, University of Colorado, Boulder, CO, USA<sup>a</sup>

Department of Ecology, Evolution and Conservation Biology, University of Hawai'i at Manoa, Honolulu, HI, USA<sup>b</sup>

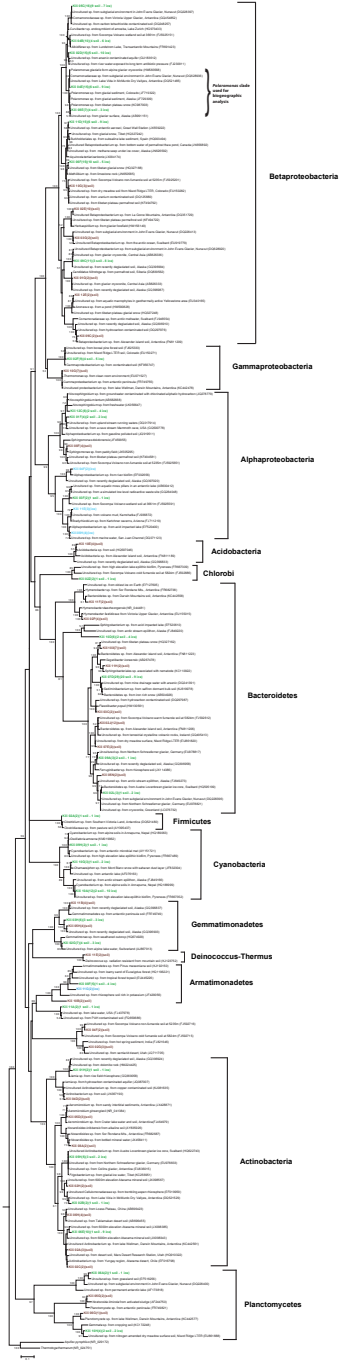

Fig. 1. Phylogenetic analysis of 158,453 bacterial and archaeal genomes. The tree is rooted at the bottom left. The scale bar represents 0.1 substitutions per site. The tree is rooted at the bottom left. The scale bar represents 0.1 substitutions per site. The tree is rooted at the bottom left. The scale bar represents 0.1 substitutions per site.

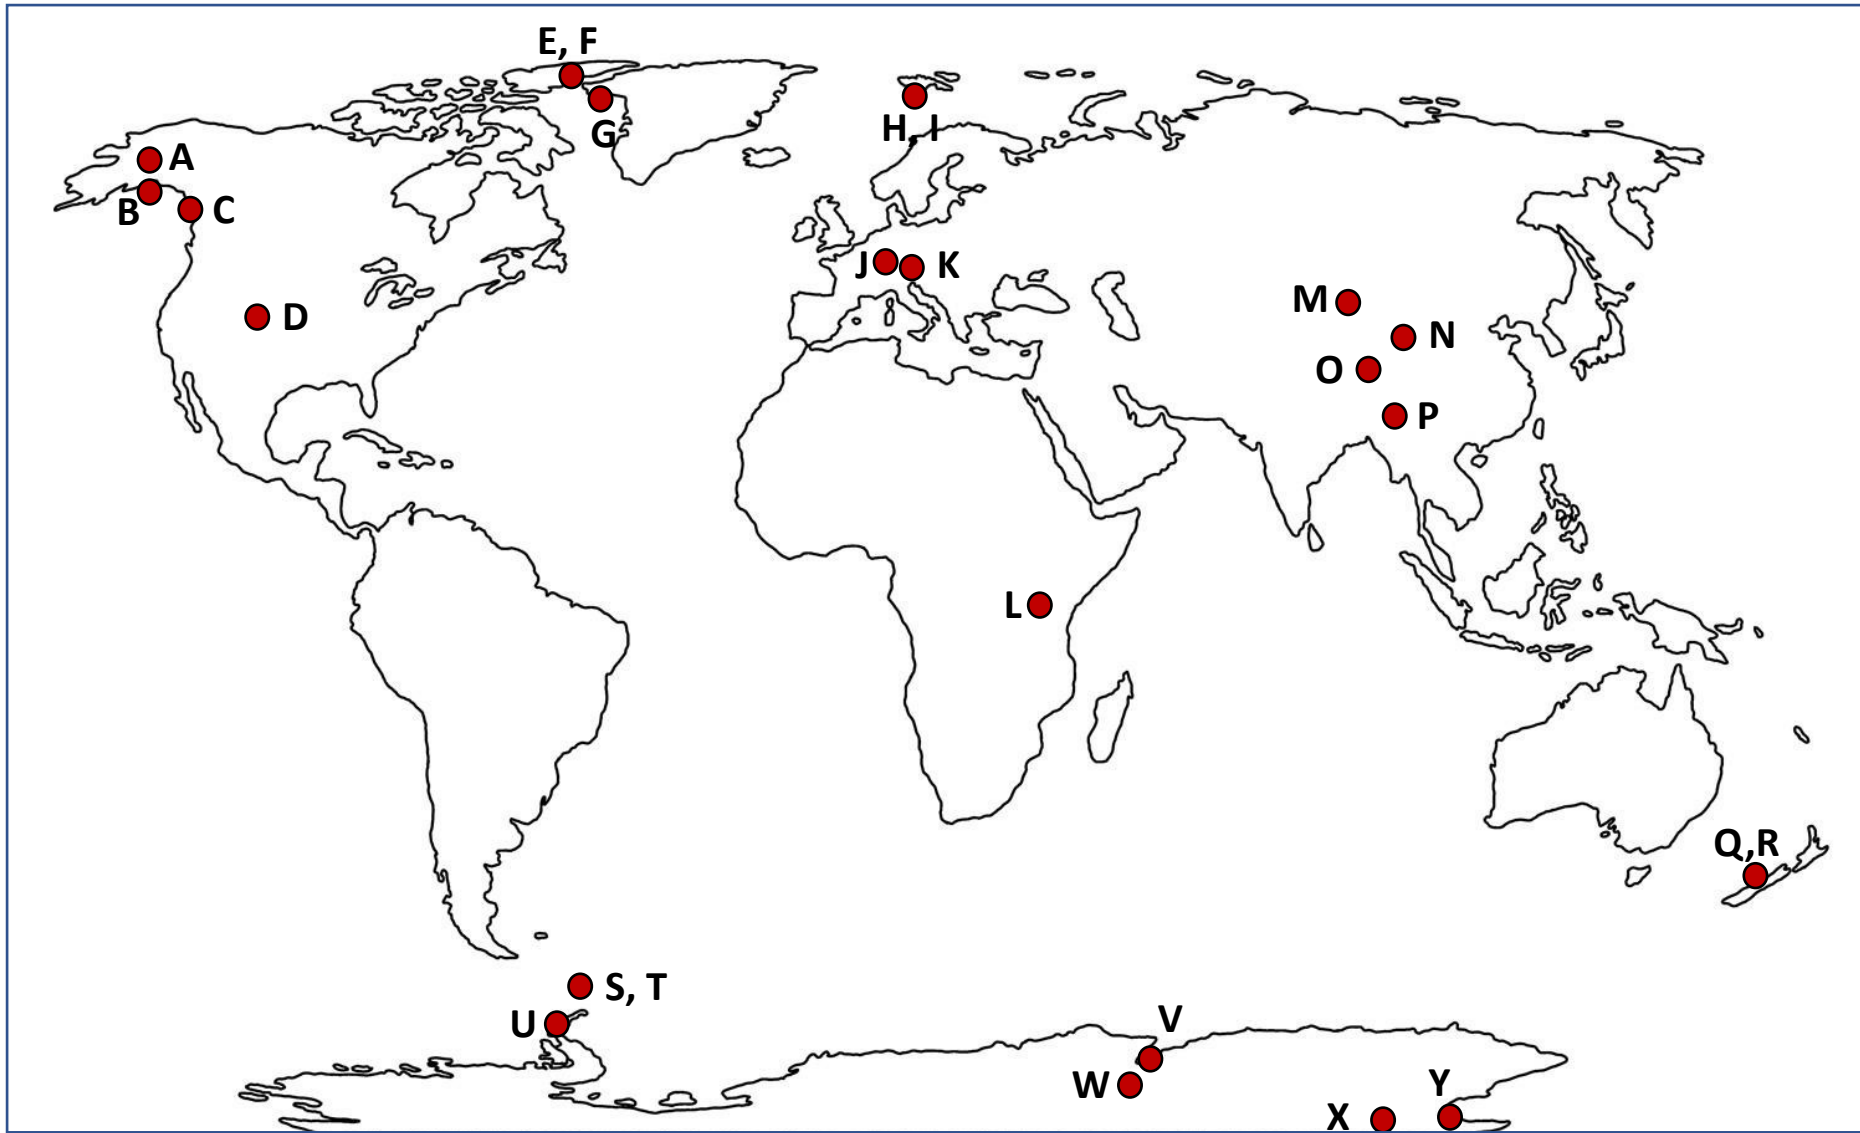

SUPP. FIG. 2. Locations of worldwide sampling sites of *Polaromonas* sequences. Alphabetic labels (A – Y) for location markers correspond to those of Supp. Table 2.

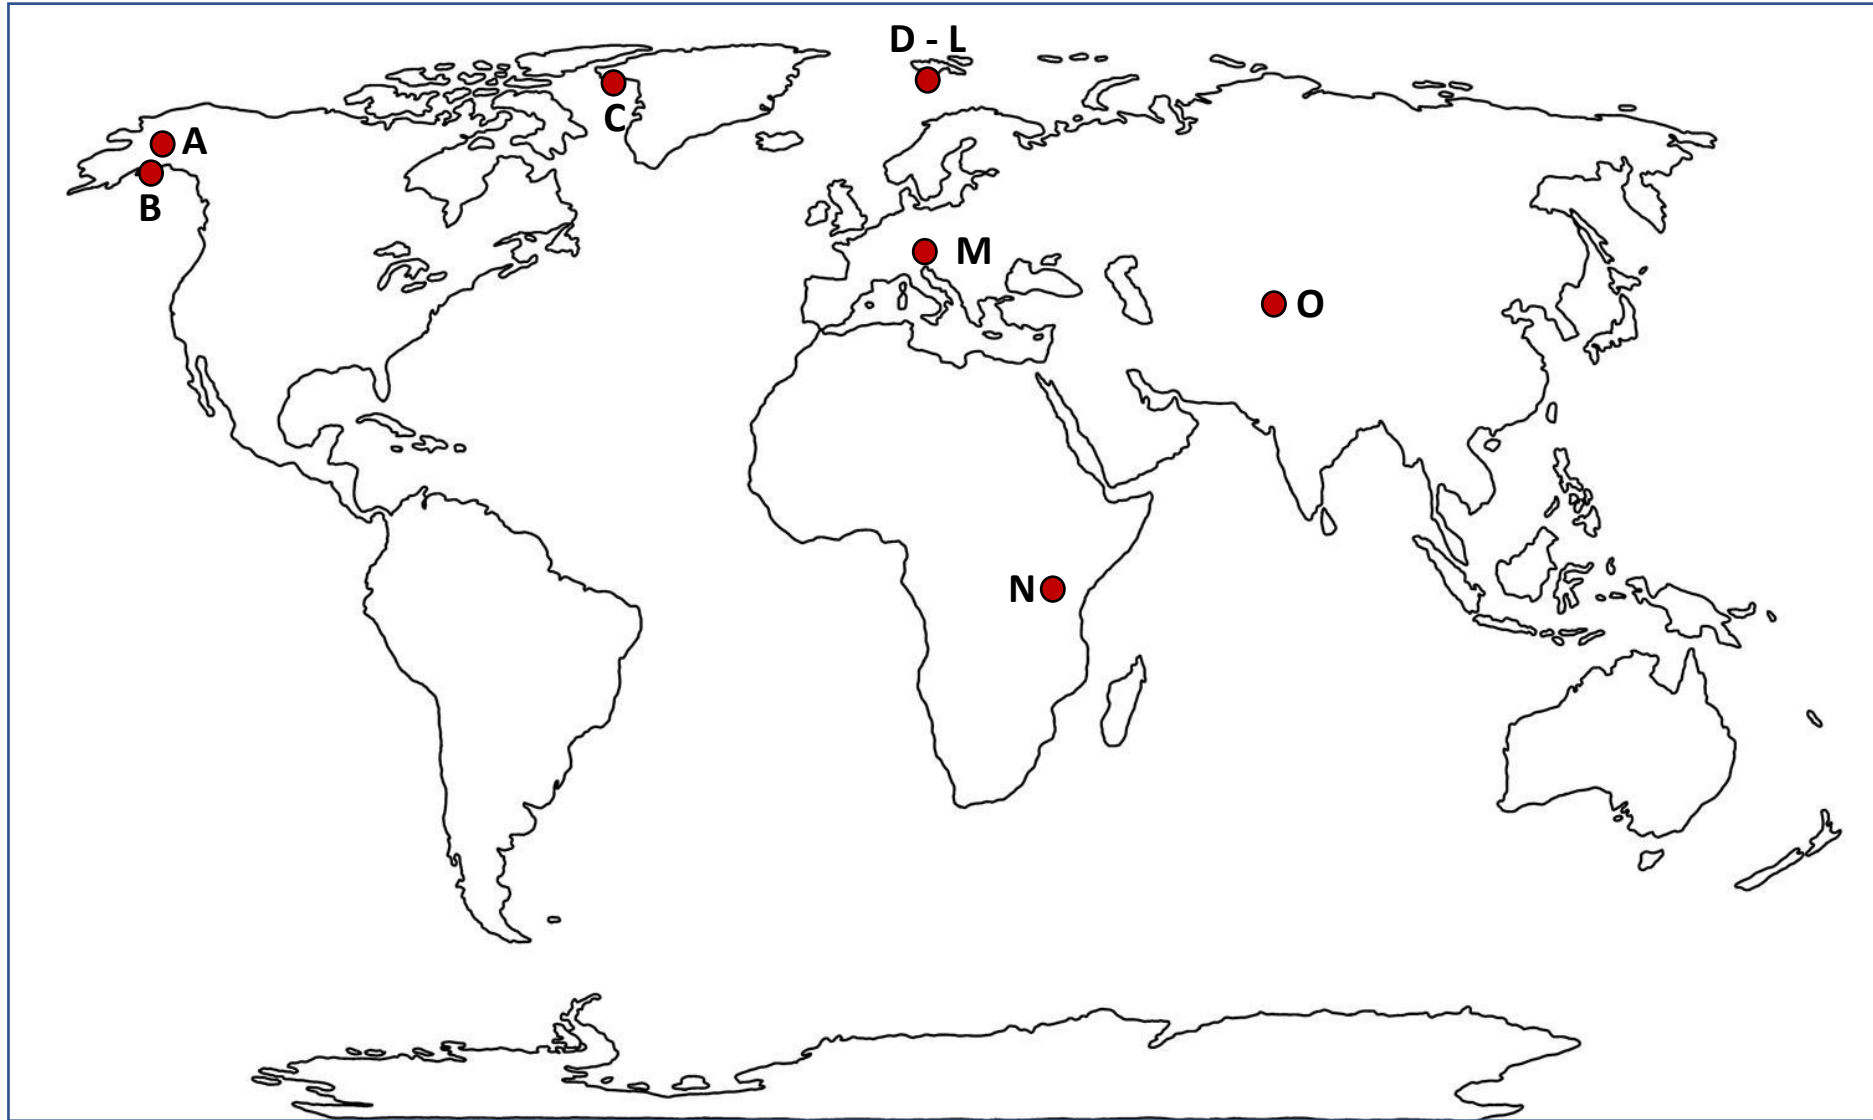

SUPP. FIG. 3. Locations of worldwide sampling sites of *Chlamydomonas* sequences. Alphabetic labels (A – O) for location markers correspond to those of Supp. Table 3.

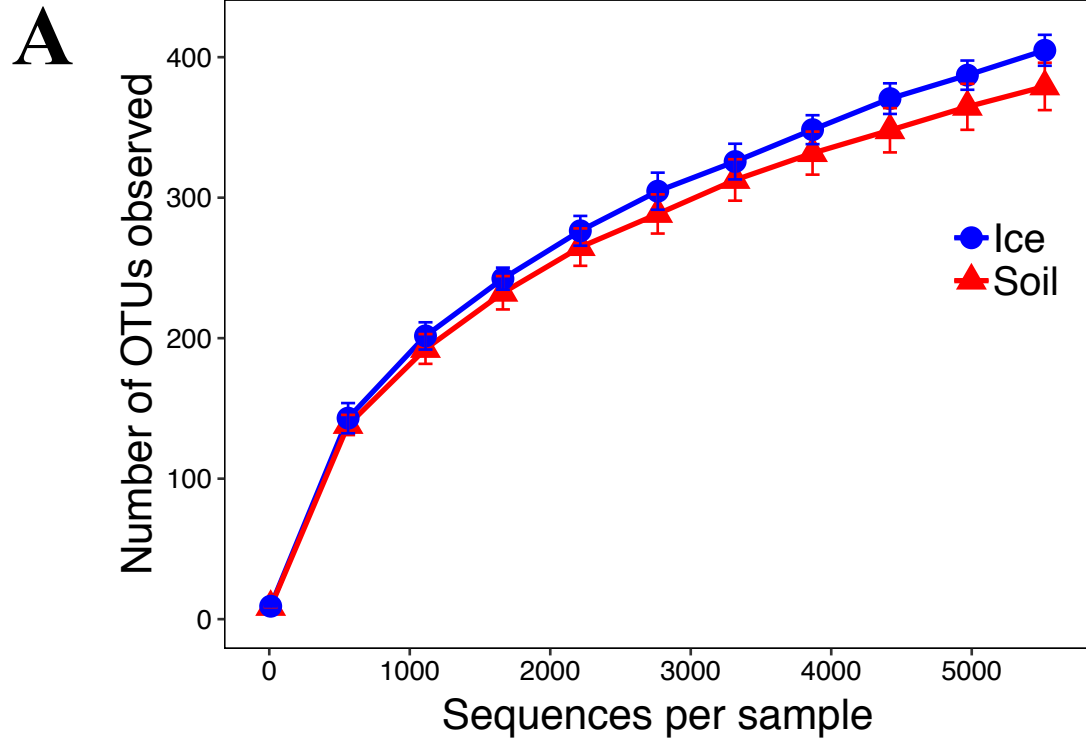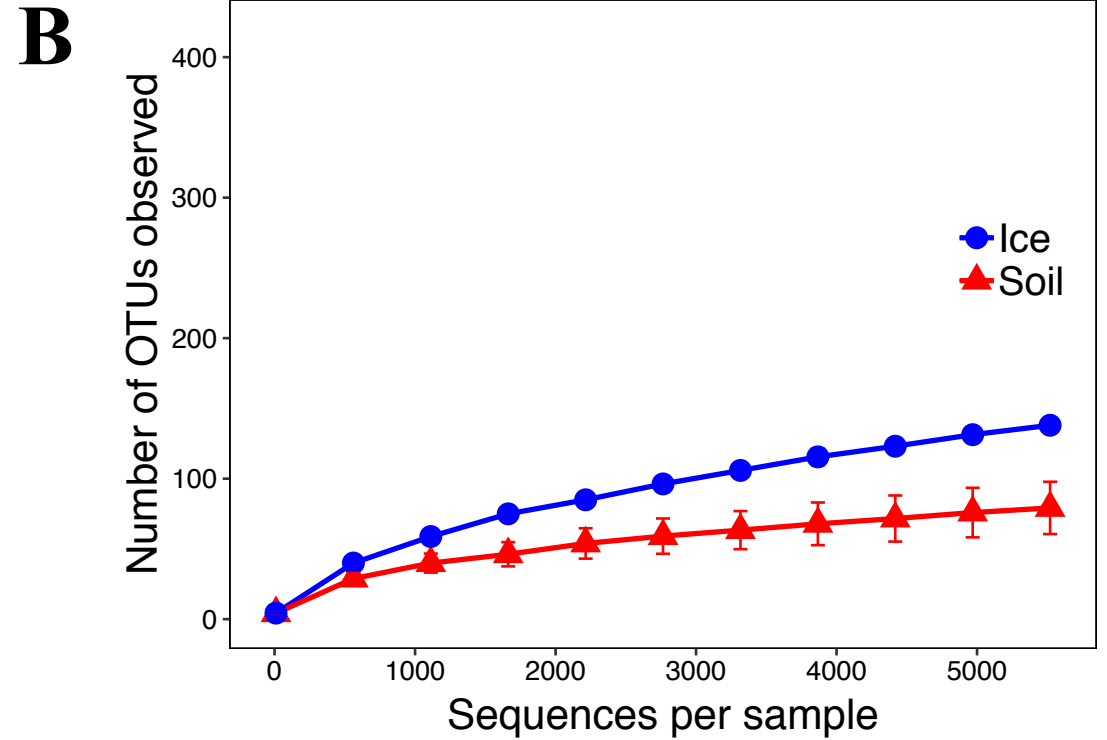

SUPP. FIG. 4. Alpha rarefaction curves based on the number of OTUs observed of 16S (A) and 18S (B) rRNA gene sequences obtained from ice and soil samples close to the summit of Mt. Kilimanjaro. Data shown are means  $\pm$  s.e. The number of bacterial OTUs observed is comparable in ice and soil samples and close to saturation at the sequencing depth used. On the other hand, fewer eukaryotic OTUs are present in soil samples compared to ice. The metric reveals that sampling saturation is reached at a smaller sequencing depth for soil samples compared to ice for eukaryotes.

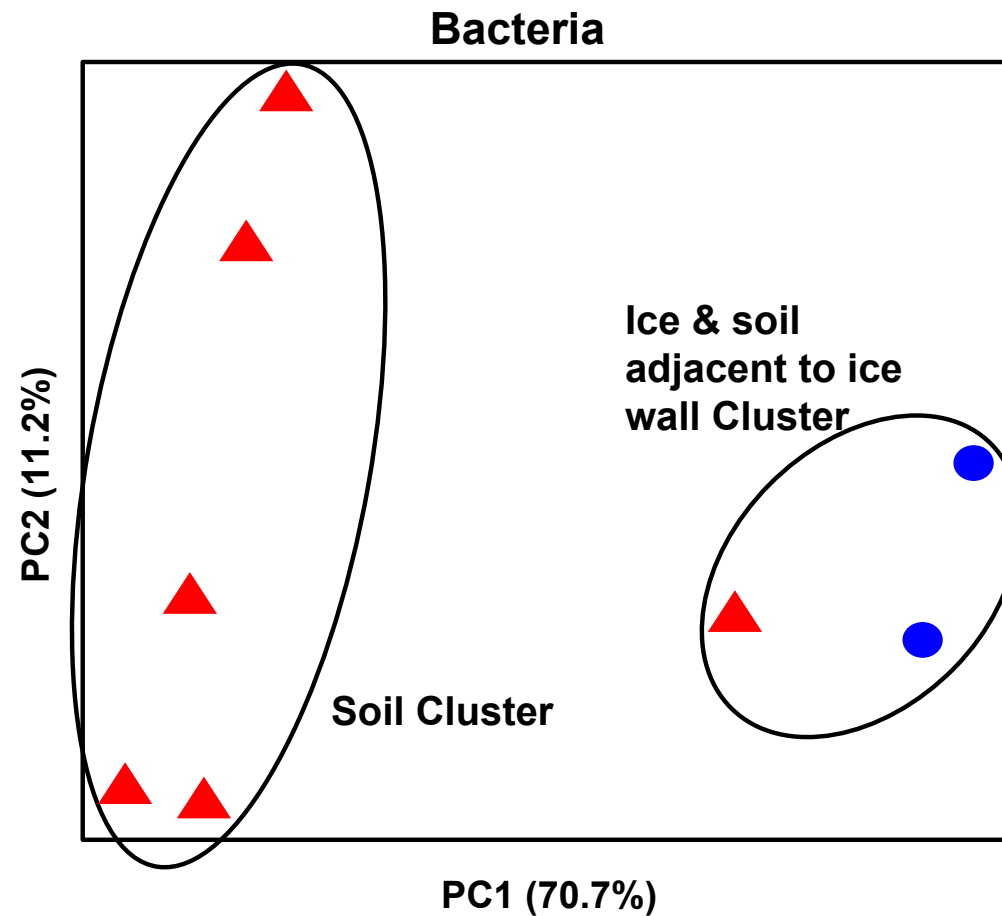

SUPP. FIG. 5. Cluster diagram-based PCoA (Principal Coordinate Analysis) using weighted Unifrac of Bacteria of ice and soil samples retrieved close to Mt. Kilimanjaro summit. The variance explained in each axis is given in parenthesis. Colors indicate samples from ice (blue) and soil (red). Bacterial ice communities are significantly different from soil communities (ANOSIM  $R = 0.8$ ,  $P = 0.03$ ). Bacterial communities from the same habitat are more similar to each other than they are to the other habitat type with the exception of the soil sample closest to the ice wall that clusters with the ice samples.

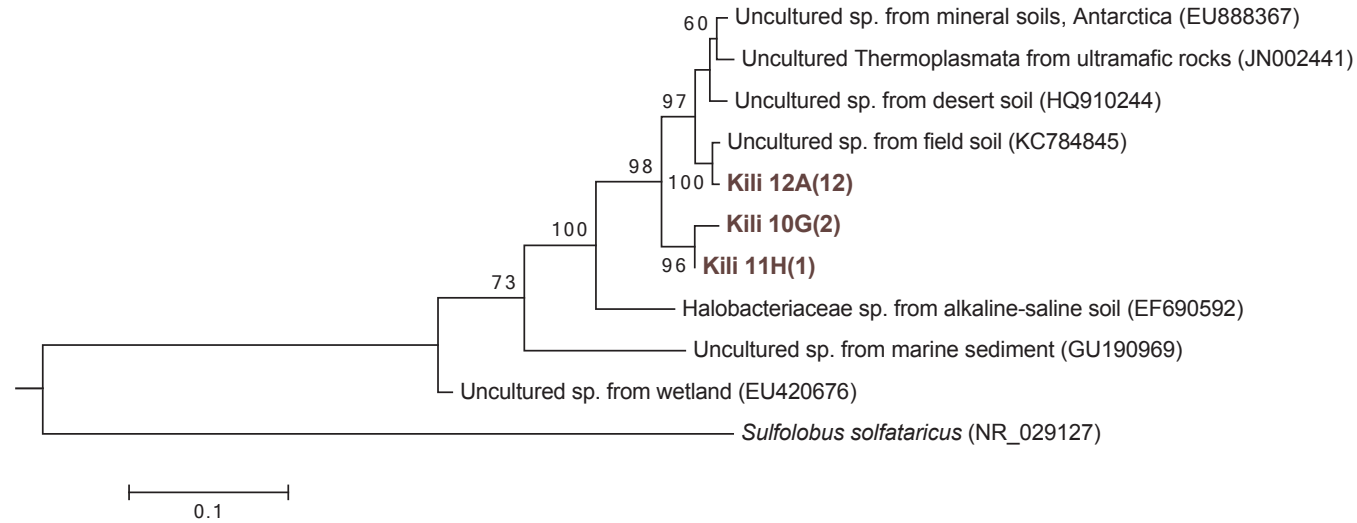

SUPP. FIG. 6. Phylogenetic analysis of 16S rRNA gene archaeal sequences retrieved in a soil sample (N7) close to Mt. Kilimanjaro summit. Maximum likelihood consensus phylogenetic tree includes 16S rRNA gene archaeal sequences from soil close to the summit of Mt. Kilimanjaro and their closest GenBank BLAST matches. The accession number of most closely related taxa are listed parenthetically. Tree is rooted with the sequence of *Sulfolobus solfataricus* (NR\_029127). Kilimanjaro phylotypes are bolded in brown and followed by the number of sequences in each phylotype of the library. Node support is given as maximum likelihood values (n. of bootstrap replicates) when equal or greater that 50%. The scale bar corresponds to 0.1 substitutions per site.

**SOIL Illumina MiSeq Bacteria Library**

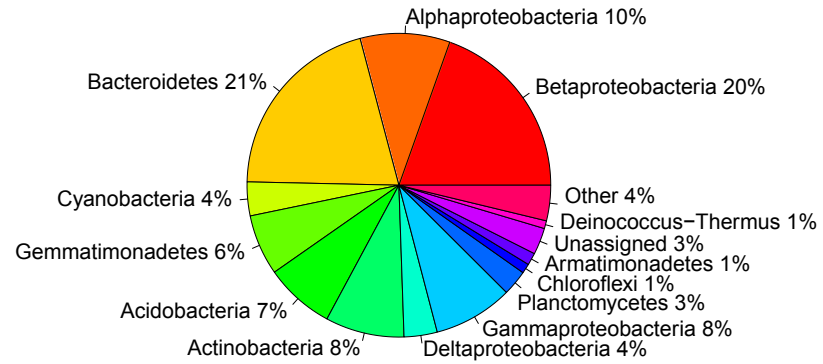

**SOIL Sanger Bacteria Library**

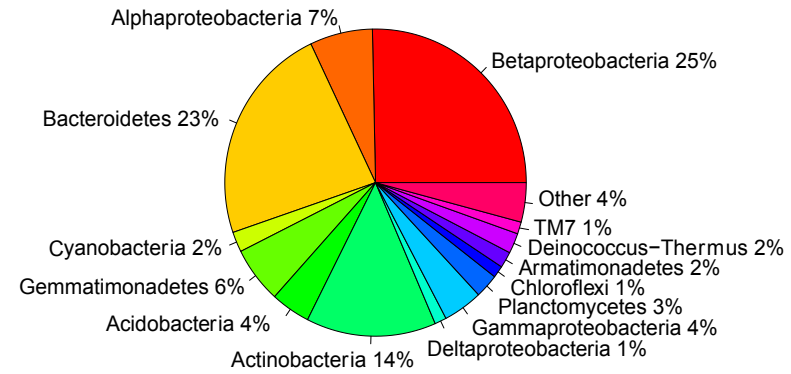

**ICE Illumina MiSeq Bacteria Library**

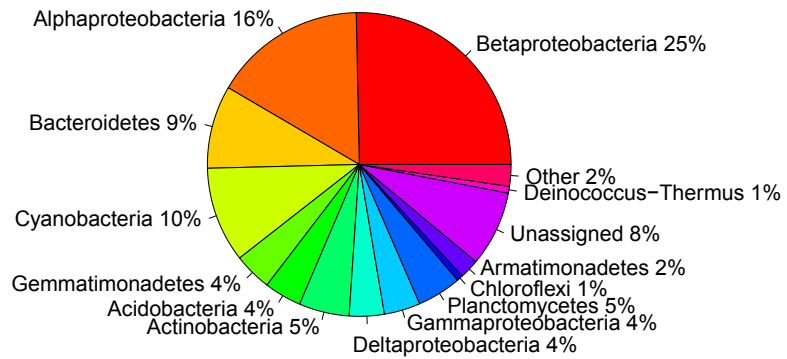

**ICE Sanger Bacteria Library**

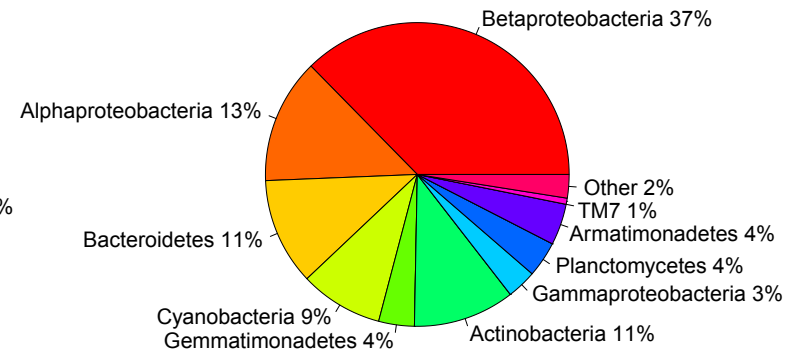

SUPP. FIG. 7. Comparison between broad-level phylogenetic affiliation of Kilimanjaro ice (samples N3 and N8) and soil (samples N1, N5 and N7) bacterial sequences obtained with Illumina MiSeq and Sanger sequencing technologies.



**SOIL Illumina MiSeq Eukarya Library**

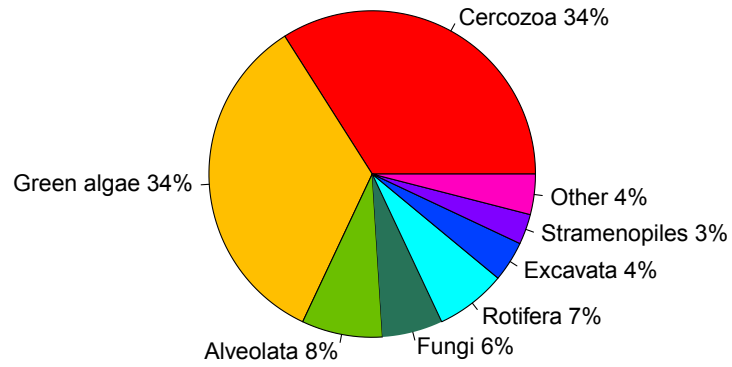

**SOIL Sanger Eukarya Library**

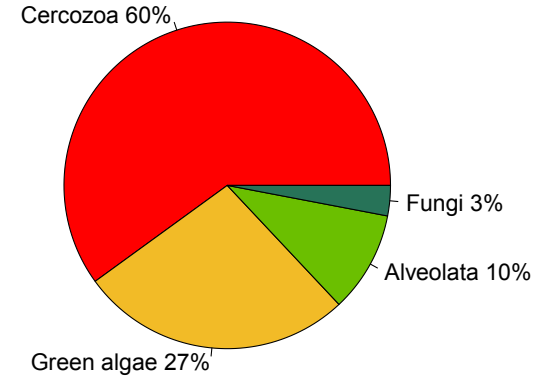

**ICE Illumina MiSeq Eukarya Library**

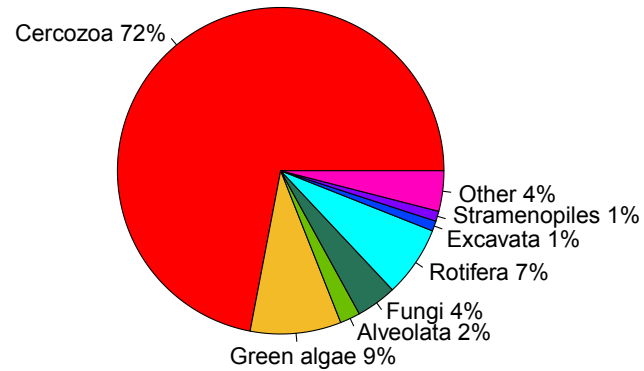

**ICE Sanger Eukarya Library**

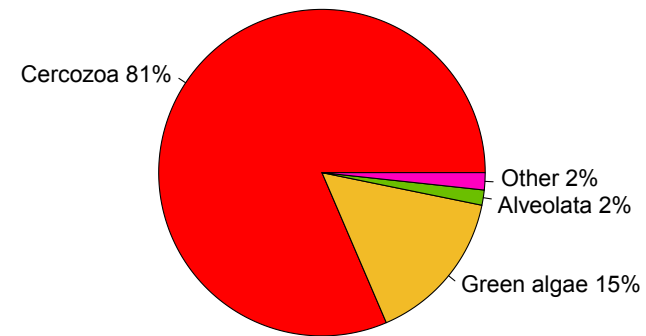

SUPP. FIG. 8. Comparison between broad-level phylogenetic affiliation of Kilimanjaro ice (samples N3 and N8) and soil (samples N1, N5 and N7) Eukaryotic sequences obtained with Illumina MiSeq and Sanger sequencing technologies. Illumina MiSeq (pie charts on left) show more phyla than Sanger libraries (pie charts on the right). Eukaryotic libraries are heavily dominated by Cercozoa in both habitats, in particular in the ice.



SUPP. TABLE 2. Locations, accession numbers, and publication sources for *Polaromonas* sequences.

| REGION          | SITE                                   | GEOGRAPHIC COORDINATES | ACCESSION N.                                                                            | PUBLICATION SOURCE                  | ON SUPP. FIG. 2 |
|-----------------|----------------------------------------|------------------------|-----------------------------------------------------------------------------------------|-------------------------------------|-----------------|
| Alaska, USA     | Toklat Glacier                         | 63.39 N 149.91 W       | JF719324-28, 30-38, JF729309                                                            | Darcy <i>et al.</i> , 2011          | A               |
|                 | Byron Glacier                          | 60.74 N 148.85 W       | AB991151                                                                                | Murakami <i>et al.</i> , 2015       | B               |
|                 | Mendenhall Glacier                     | 58.435837 N 134.5546 W | GQ396863, 949, 971                                                                      | Sattin <i>et al.</i> , 2011         | C               |
| Colorado, USA   | Arikaree Glacier                       | 40.057276 N 105.6432 W | JF719322, 3, 9                                                                          | Darcy <i>et al.</i> , 2011          | D               |
| Nunavut, Canada | Johns Evans Glacier                    | 79.66 N 74 W           | DQ228403, 9                                                                             | Skidmore <i>et al.</i> , 2007       | E               |
| Nunavut, Canada | Johns Evans Glacier                    | 79.63 N 74.38 W        | DQ628932-40, DQ530258                                                                   | Cheng <i>et al.</i> , 2007          | F               |
| Greenland       | Qaanaaq Glacier                        | 77.5033 N 69.1458 W    | LC076717                                                                                | Uetake <i>et al.</i> , (unpubl.)    | G               |
| Svalbard        | Hans Glacier                           | 77.04 N 15.39 E        | KU586648, KU586652                                                                      | Gawor <i>et al.</i> , 2016          | H               |
|                 | Werenskiold Glacier                    | 77.075 N 15.34 E       | MG098816                                                                                | Ciok <i>et al.</i> (unpubl.)        | I               |
| Germany         | Schneeferner Glacier                   | 47.42 N 10.98 E        | EU978852                                                                                | Simon <i>et al.</i> , 2009          | J               |
| Austria         | Pitztaler Joechl Glacier               | 46.55 N 10.53 E        | NR_109012-13                                                                            | Margesin <i>et al.</i> , 2012       | K               |
| Tanzania        | Kilimanjaro, 5772 m.a.s.l.             | 3.04839 S 37.21628 E   | KX771285-86, KX771324-26, KX771367, KX771372, KX771376, KX771395, KX771538, KX771602-13 | This study                          | L               |
| Tianshan, China | Glacier n.1                            | 43.15 N 86.87 E        | EF423322, 30, 40                                                                        | Wang <i>et al.</i> (unpubl.)        | M               |
|                 | Glacier n.1                            | 43.15 N 86.87 E        | FJ979854, 9                                                                             | Zhang <i>et al.</i> (unpubl.)       | M               |
| China           | Glacier in Gansu Province              | 39.7 N 96.62 E         | JX950030, 31                                                                            | Liu <i>et al.</i> (unpubl.)         | N               |
| Tibet, China    | Puruogangri Ice Field                  | 33.89 N 89.15 E        | DQ227793                                                                                | Zhang <i>et al.</i> , 2008          | O               |
|                 | Glacier                                | 29.45 N 96.5 E         | JX949585                                                                                | Liu <i>et al.</i> (unpubl.)         | P               |
| New Zealand     | Franz Joseph Glacier                   | 43.48 S 170.21 E       | AY315174, 5, 8                                                                          | Foght <i>et al.</i> , 2004          | Q               |
|                 | Fox Glacier                            | 45.51 S 170.14 E       | AY315176, 7                                                                             | Foght <i>et al.</i> , 2004          | R               |
| Antarctica      | Carlini station, King George Island    | 62.14 S 58.4 W         | KY190582, KY190658, KY190735, KY190746, KY190773, KY190785                              | Vazquez <i>et al.</i> (unpubl.)     | S               |
|                 | Baranowski Glacier, King George Island | 62.12 S 58.27 W        | MG098808                                                                                | Ciok <i>et al.</i> (unpubl.)        | T               |
|                 | Palmer Station, Anvers Island          | 64.46 S 64.02 W        | 5 sequences, unpubl.                                                                    | Vimercati <i>et al.</i> (unpubl.)   | U               |
|                 | Davis Station                          | 68.34 S 77.58 E        | JX196642                                                                                | Xiong <i>et al.</i> (unpubl.)       | V               |
|                 | Collins Glacier                        | 73.21 S 66.97 E        | EU636025-27, EU636029                                                                   | Garcia-Echauri <i>et al.</i> , 2011 | W               |
|                 | Kamb Ice Stream                        | 82.25 S 145 E          | FJ477327                                                                                | Lanoil <i>et al.</i> , 2009         | X               |
|                 | Lake Vida, Dry Valleys                 | 77.23 S 161.56 E       | DQ521547                                                                                | Mosier <i>et al.</i> , 2007         | Y               |

SUPP. TABLE 3. Locations, accession numbers, and publication sources for *Chlamydomonas* sequences.

| REGION     | SITE                       | GEOGRAPHIC COORDINATES | ACCESSION N.                                                                                                                                                                             | PUBLICATION SOURCE      | ON SUPP. FIG. 3 |
|------------|----------------------------|------------------------|------------------------------------------------------------------------------------------------------------------------------------------------------------------------------------------|-------------------------|-----------------|
| Alaska     | Toklat Glacier             | 63.39 N 149.91 W       | KM870616-7, KM870646, KM870652, KM870656, KM870662, KM870665-6, KM870675, KM870675, KM870679, KM870685, KM870691, KM870694, KM870731, KM870743-4, KM870752, KM870766, KM870769, KM870771 | Darcy et al., 2011      | A               |
|            | Harding Icefield           | 60.0031 N 150.007 W    | AB902998                                                                                                                                                                                 | Ito et al. (unpubl.)    | B               |
| Greenland  | Qaanaq Glacier             | 77.8973 N 64.877 W     | AB902971                                                                                                                                                                                 | Ito et al. (unpubl.)    | C               |
| Svalbard   |                            | 77.66 N 14.82 E        | JQ790560                                                                                                                                                                                 | Remias et al. (unpubl.) | D               |
|            |                            | 78.16 N 17.89 E        | JQ790557                                                                                                                                                                                 | Remias et al. (unpubl.) | E               |
|            |                            | 78.18 N 15.48 E        | JQ790558                                                                                                                                                                                 | Remias et al. (unpubl.) | F               |
|            |                            | 79.63 N 10.97 E        | AF514411                                                                                                                                                                                 | Leya et al. (unpubl.)   | G               |
|            |                            | 79.27 N 11.77 E        | AF514412                                                                                                                                                                                 | Leya et al. (unpubl.)   | H               |
|            |                            | 79.81 N 11.83 E        | GU117586                                                                                                                                                                                 | Remias et al., 2010     | I               |
|            |                            | 77.57 N 16.9 E         | JQ790559                                                                                                                                                                                 | Remias et al. (unpubl.) | J               |
|            |                            | 78.97 N 11.58 E        | AF514407                                                                                                                                                                                 | Leya et al. (unpubl.)   | K               |
|            |                            | 79.74 N 10.83 E        | GU117588                                                                                                                                                                                 | Remias et al., 2010     | L               |
| Austria    | Tyrol                      | 46.92 N 10.93 E        | GU117577                                                                                                                                                                                 | Remias et al., 2010     | M               |
| Tanzania   | Kilimanjaro, 5772 m.a.s.l. | 3.04 S 37.21 E         | KX771779-800, KX772005                                                                                                                                                                   | This study              | N               |
| Tajikistan | Pamir                      | 38.7851 N, 72.272 E    | AB902973                                                                                                                                                                                 | Ito et al. (unpubl.)    | O               |
